# Supplementary material for: How pH Orchestrates the Structure of the Periplasmic Glutamate-Binding Protein
Source: Research Square preprint supplement (doi:10.21203/rs.3.rs-8482768/v1), 2026-01-14
Supplement: Supplementary file 1 [file SS_GluB_pH10.0.xlsx]

## Sheet: Foglio1
pH: 10.0
Wavelength (nm)	GluB (10 µM)	GluB (10 µM) + L-Glu (100 µM)
310	1362.13	1643.2
311	1312.8	1483.2
312	1351.47	1509.87
313	1430.13	1521.87
314	1502.13	1645.87
315	1623.47	1705.87
316	1794.13	1827.2
317	1914.13	2033.87
318	2052.8	2129.87
319	2154.13	2280.53
320	2291.47	2507.2
321	2476.8	2597.87
322	2652.8	2709.87
323	2902.13	2973.87
324	2994.13	3132.53
325	3208.8	3293.87
326	3387.47	3415.2
327	3524.8	3628.53
328	3674.13	3891.2
329	3907.47	4061.87
330	4044.8	4315.2
331	4304.8	4509.87
332	4406.13	4567.2
333	4659.47	4839.2
334	4824.8	4984.53
335	4951.47	5287.2
336	5144.8	5368.53
337	5288.8	5513.87
338	5422.13	5639.2
339	5570.13	5785.87
340	5720.8	5916.53
341	5866.13	6088.53
342	5968.8	6255.2
343	6036.8	6363.2
344	6152.8	6488.53
345	6340.8	6645.87
346	6346.13	6671.2
347	6467.47	6827.2
348	6543.47	6876.53
349	6691.47	7059.2
350	6743.47	7111.2
351	6844.8	7152.53
352	6863.47	7271.2
353	6991.47	7245.87
354	6962.13	7313.87
355	6926.13	7340.53
356	6983.47	7320.53
357	6983.47	7265.87
358	6916.8	7297.87
359	6852.8	7183.2
360	6706.13	7115.2
361	6600.8	7005.87
362	6568.8	6937.87
363	6287.47	6687.2
364	6291.47	6601.87
365	6039.47	6473.87
366	5939.47	6183.2
367	5807.47	5964.53
368	5534.13	5781.87
369	5388.8	5661.87
370	5088.8	5363.2
371	4908.8	5192.53
372	4720.8	5117.87
373	4639.47	4856.53
374	4462.13	4604.53
375	4371.47	4539.2
376	4202.13	4347.2
377	4007.47	4212.53
378	3922.13	4117.87
379	3868.8	4020.53
380	3823.47	3944.53
381	3670.13	3865.87
382	3568.8	3743.2
383	3504.8	3692.53
384	3410.13	3569.87
385	3298.13	3539.2
386	3299.47	3415.2
387	3195.47	3387.2
388	3120.8	3276.53
389	3024.8	3168.53
390	2930.13	3080.53
391	2898.13	3025.87
392	2835.47	2977.87
393	2778.13	2924.53
394	2719.47	2816.53
395	2682.13	2771.2
396	2574.13	2708.53
397	2464.8	2593.87
398	2420.8	2535.2
399	2312.8	2472.53
400	2300.8	2403.2
401	2208.8	2291.2
402	2152.8	2307.2
403	2088.8	2176.53
404	2019.47	2127.2
405	2003.47	2069.87
406	1918.13	1980.53
407	1832.8	1976.53
408	1766.13	1912.53
409	1708.8	1796.53
410	1662.13	1761.87
