# Supplementary material for: How pH Orchestrates the Structure of the Periplasmic Glutamate-Binding Protein
Source: Research Square preprint supplement (doi:10.21203/rs.3.rs-8482768/v1), 2026-01-14
Supplement: Supplementary file 4 [file SS_GluB_pH5.0.xlsx]

## Sheet: Foglio1
pH: 5.0
Wavelength (nm)	GluB (10 µM)	GluB (10 µM) + L-Glu (100 µM)
310	99029.6	115423
311	101626	118343
312	104607	120995
313	108360	124477
314	111098	128061
315	112932	130934
316	115668	133509
317	117055	134419
318	119184	136115
319	119267	137211
320	120783	137633
321	121362	137691
322	121720	138097
323	120951	138659
324	121106	137151
325	121267	137439
326	121002	136841
327	120524	135990
328	119439	135186
329	119242	134181
330	117847	132419
331	117363	131506
332	115974	129894
333	114907	127953
334	112624	126094
335	111176	124070
336	109956	120969
337	107434	119079
338	105252	116993
339	103876	113878
340	101306	111523
341	99374.9	109571
342	97898.9	107701
343	95922.9	104587
344	93836.3	102414
345	92001.6	99512.5
346	90145.6	97795.2
347	88357.6	95221.9
348	86206.9	93291.2
349	84510.9	90731.2
350	82122.9	88712.5
351	80420.3	86943.2
352	78742.9	85159.2
353	76968.3	82471.2
354	74960.3	80215.2
355	73008.3	77507.2
356	70652.3	75223.2
357	69086.9	72851.2
358	66565.6	70087.2
359	64020.3	67420.5
360	62294.9	65429.9
361	59776.3	62493.9
362	57397.6	60064.5
363	54801.6	57556.5
364	51998.9	54784.5
365	49609.6	51865.9
366	47756.3	49116.5
367	45236.3	46571.2
368	42345.6	44085.9
369	40342.9	41727.2
370	38057.6	39235.2
371	36201.6	37381.9
372	34309.6	34845.9
373	32606.9	33273.9
374	31021.6	31688.5
375	29422.9	29721.9
376	27849.6	28471.2
377	26677.6	26877.9
378	25554.9	25648.5
379	24338.9	24293.9
380	23309.6	23276.5
381	22392.3	22397.9
382	21397.6	21412.5
383	20829.6	20575.2
384	19906.9	19656.5
385	18974.9	18984.5
386	18257.6	18345.9
387	17670.9	17443.2
388	16909.6	16671.2
389	16392.3	16043.2
390	15686.9	15407.2
391	15188.3	14747.2
392	14606.9	14064.5
393	13801.6	13599.2
394	13322.9	12921.9
395	12893.6	12476.5
396	12394.9	11928.5
397	11734.9	11409.9
398	11398.9	10648.5
399	10986.9	10423.2
400	10556.3	9985.87
401	9945.6	9536.53
402	9654.93	8992.53
403	9106.93	8808.53
404	8689.6	8313.87
405	8568.27	7967.2
406	8148.27	7720.53
407	7858.93	7231.2
408	7556.27	7105.87
409	7272.27	6731.2
410	7006.93	6397.87
