# Supplementary material for: How pH Orchestrates the Structure of the Periplasmic Glutamate-Binding Protein
Source: Research Square preprint supplement (doi:10.21203/rs.3.rs-8482768/v1), 2026-01-14
Supplement: Supplementary file 7 [file SS_GluB_pH8.0.xlsx]

## Sheet: Foglio1
pH: 8.0
Wavelength (nm)	GluB (10 µM)	GluB (10 µM) + L-Glu (100 µM)
310	9434.67	8813.6
311	9360	8653.6
312	9604	8912.27
313	9965.33	9150.93
314	10342.7	9502.93
315	10920	9998.93
316	11318.7	10322.9
317	11590.7	10661.6
318	12161.3	10980.3
319	12424	11414.9
320	12817.3	11596.3
321	13189.3	11993.6
322	13613.3	12378.9
323	13810.7	12450.9
324	14212	12845.6
325	14486.7	13218.9
326	14620	13130.9
327	14678.7	13510.9
328	15026.7	13710.9
329	15082.7	13920.3
330	15286.7	14114.9
331	15309.3	14090.9
332	15482.7	14114.9
333	15510.7	14253.6
334	15516	14225.6
335	15729.3	14310.9
336	15652	14349.6
337	15586.7	14341.6
338	15562.7	14360.3
339	15408	14266.9
340	15389.3	14138.9
341	15382.7	14205.6
342	15152	14166.9
343	15044	14002.9
344	14854.7	13804.3
345	14821.3	13824.3
346	14662.7	13658.9
347	14476	13356.3
348	14444	13385.6
349	14258.7	13301.6
350	14136	13076.3
351	13904	12969.6
352	13633.3	12854.9
353	13682.7	12676.3
354	13098.7	12558.9
355	13021.3	12232.3
356	12788	11957.6
357	12618.7	11848.3
358	12322.7	11598.9
359	11994.7	11264.3
360	11709.3	10948.3
361	11322.7	10677.6
362	10916	10256.3
363	10566.7	10006.9
364	10176	9506.93
365	9684	9268.27
366	9318.67	8742.93
367	8898.67	8417.6
368	8473.33	7982.93
369	8078.67	7625.6
370	7748	7286.93
371	7353.33	6974.93
372	7088	6632.27
373	6646.67	6345.6
374	6378.67	6148.27
375	6174.67	5956.27
376	5858.67	5636.27
377	5692	5453.6
378	5478.67	5157.6
379	5312	5065.6
380	5056	4950.93
381	4953.33	4773.6
382	4770.67	4692.27
383	4640	4452.27
384	4520	4262.93
385	4468	4246.93
386	4310.67	4109.6
387	4265.33	4004.27
388	4028	3936.27
389	3950.67	3776.27
390	3865.33	3606.93
391	3656	3536.27
392	3576	3497.6
393	3541.33	3346.93
394	3445.33	3192.27
395	3205.33	3182.93
396	3154.67	3037.6
397	3069.33	2934.93
398	2933.33	2880.27
399	2868	2737.6
400	2760	2701.6
401	2680	2616.27
402	2530.67	2497.6
403	2493.33	2438.93
404	2366.67	2361.6
405	2288	2193.6
406	2216	2189.6
407	2136	2122.93
408	2134.67	2061.6
409	2025.33	1934.93
410	1952	1870.93
